# Supplementary material
Source: MDPI journal article supplement (https://www.mdpi.com/2071-1050/10/8/2834)
Supplement: s1 [file s1]

**Supplementary**

**Table S1.** List of included 41 publications comparing landraces against other variety types. (Declaration of the comparing variety type according to the used term in the publication)

| **Paper** | **Landrace** | **Comparing variety type** | **Crop species** | **Country** | **Approach** | **Results within the field of:** | **Plus/minus/**  **unclear effect** |
| --- | --- | --- | --- | --- | --- | --- | --- |
| 1. Biasi 2015 [1] | LR | NO | Grapewine | Italy | Experiment | Crop pollination | plus |
| Biodiversity richness | plus |
| Resilience to environmental changes | Plus |
| 2. Li J. et al. 2012 [2] | LR | F1-Hybrid | Maize | China | Survey (semi-structured interviews) | Resilience to environmental changes | Plus |
| Crop yield | Minus |
| Tradition, cooking characteristics, nutritional values, taste, and color | Plus |
| 3. Tamiru A. et al. 2011 [3] | LR | F1-Hybrid | Maize | Kenya | Experiment | Biological pest & disease control | Plus |
| 4. Munoz-Perea et al. 2007 [4] | LR | cultivar | Dry bean | Western USA | Experiment | Resilience to environmental changes | Plus |
| 5. Sangabriel-Conde W. et al. 2014 [5] | LR | F1-Hybrid | Maize | Mexico | Experiment | Crop nutrient use efficiency | Plus |
| 6. Fang Y. et al. 2011 [6] | LR | Improved variety | Winter wheat | China | Experiment | Crop yield | Plus/minus |
| Crop nutrient use efficiency | Plus |
| 7. Noguera D. et al. 2011 [7] | LR | F1-Hybrid, improved variety | Rice | Columbia | Experiment | Crop yield | Plus/minus |
| 8. Lafitte H. R. et al. 1997 [8] | LR | Improved cultivar | Maize | Mexico | Experiment | Crop yield | Minus |
| Crop nutrient use efficiency | Plus |
| 9. Ghosh R. et al. 2014 [9] | LR | Improved cultivar | Chickpea | India | Experiment | Crop yield | Minus |
| 10. Fang Y. et al. 2014 [10] | LR | Modern cultivar | Winter wheat | China | Experiment | Crop yield | Minus |
| 11. Annicchiarico P. et al. 2012 [11] | LR | Local cultivar | Lucerne | Italy | Experiment | Crop yield | Unclear |
| 12. Vaezi B. et al. 2010 [12] | LR | Genotype | Barley | Iran | Experiment | Crop yield | Unclear |
| Resilience to environmental changes | Plus |
| 13. Brocke K. et al. 2014 [13] | LR | Improved variety | Sorghum | Bukina Faso | Experiment | Resilience to environmental changes | Plus |
| Crop yield | Plus |
| 14. Mwololo J.K. et al. 2012 [14] | LR | F1-Hybrid | Maize | Kenya | Experiment | Biological pest & disease control | Unclear |
|  | Unclear |
| 15. Knezevic-Jaric J.et al. 2014 [15] | LR | F1-Hybrid | Maize | Eastern Serbia | Survey (interview-based open-ended questions) | Resilience to environmental changes | Plus |
| Crop yield | Minus |
| Storage ability | Plus |
| 16. Calvet-Mir L.. et al. 2011 [16] | L R | Commercial variety | several | Iberian Peninsula | Survey (semi-structured interviews) | Biological pest & disease control | Plus |
| Resilience to environmental changes | Plus |
| Crop yield | Minus |
| Cultivation effort and crop storability | Minus |
| Tradition, cooking characteristics, nutritional values, taste, and color | Plus |
| 17. Yadav O. et al. 2010 [17] | LR | Improved variety | Pearl millet | India (Rajasthan) | Experiment | Resilience to environmental changes | Plus |
| Crop yield | Plus |
| 18. Annicchiarico P. et al. 2007 [18] | LR | Improved variety | Lucernce | Italia | Experiment | Crop yield | Unclear |
| 19. D'Antuono L.F. et al. 2006 [19] | LR | Commercial variety | Lineseed,  flax | Italy | Experiment | Resilience to environmental changes | Plus |
| Crop yield | Unclear |
| 20. Vom Brocke K. et al. 2003 [20] | LR | Modern variety | Pearl millet | India (Rajasthan) | Experiment | Resilience to environmental changes | Plus |
| Crop nutrient use efficiency | Unclear |
| 21. Boutraa T. et al. 2001 [21] | LR | Cultivar | Common bean | Great Britain | Experiment | Crop yield | Plus |
| 22. Moreno L. et al. 2006 [22] | LR | Improved variety | Maize | Mexico | Survey  (semi-structured interviews) | Biological pest & disease control | Plus |
| Cultivation effort and crop storability | Plus |
| Tradition, cooking characteristics, nutritional values, taste, and color | Plus |
| 23. Mazvimbakupa F. et al. 2015 [23] | LR | F1-Hybrid | maize | NA | Experiment | Resilience to environmental changes | Plus |
| Crop yield | Minus |
| 24. Kolech S. A. et al. 2015 [24] | LR | Improved variety | potato | Ethiopia | Survey  (data collection of socioeconomic situation of farmers, variety assessment and identification of farmers) | Resilience to environmental changes | Plus |
| Nutritional status of plants | Plus |
| 25. Leiser W. L. et al. 2015 [25] | LR | Research bred line | Sorghum | Mali (West Africa) | Experiment | Resilience to environmental changes | Plus |
| Crop yield | Plus |
| 26. Patil J.V. et al. 2014 [26] | LR | F1-Hybrid | Sorghum | India | Conceptual paper | Biological pest & disease control | Plus |
| Resilience to environmental changes | Plus |
| Crop yield | Plus |
| 27. Yong'an L. et al. 2010 [27] | LR | Modern variety | Spring wheat | China | Experiment | Resilience to environmental changes | Plus |
| Crop yield | Unclear |
| 28. Olson M.B. et al. 2012 [28] | LR | Improved variety | Maize | El Salvador | Survey  (semi-structured interviews and focus groups) | Biological pest & disease control | Minus |
| Resilience to environmental changes | Plus |
| Crop yield | Minus |
| Tradition, cooking characteristics, nutritional values, taste, and color | Plus |
| 29. Almekinders C. et al. 2007 [29] | LR | Improved variety | NA | Bolivia | Conceptual paper | Resilience to environmental changes | Plus |
| 30. Bardsley D. et al. 2005 [30] | LR | Improved variety | Wheat | Northeastern Turkey | Survey  (semi-structured, interactive, open-ended interviews approach with farmers and stakeholders) | Biological pest & disease control | Minus |
| Resilience to environmental changes | Plus |
| Crop yield | Unclear |
| 31. Annicchiarico P. et al. 2006 [31] | LR | Improved variety | Lucerne | Italy | Experiment | Resilience to environmental changes | Plus |
| Crop yield | Plus |
| 32. Maggs-Kolling G.L. et al. 2003 [32] | LR | Modern variety | Watermelon | Namibia | Experiment |
| Resilience to environmental changes | Unclear |
| Crop yield | Plus |
| Cultivation effort and crop storability | Unclear |
| 33. Joshi D.K.et al. 2001 [33] | LR | Popular variety | Rice | Nepal & India | Survey  (semi-structured interviews) | Crop yield | Li |
| 34. Newton A.C. et al. 2010 [34] | LR | Improved variety | cereals | NA | Conceptual paper | Biological pest & disease control | Plus |
| Resilience to environmental changes | Plus |
| Crop nutrient use efficiency | Plus |
| 35. Zimmerer K.S. 2014 [35] | LR | NA | Maize | Bolivia | Survey  (semi-structured interviews) | Resilience to environmental changes | Plus |
| Tradition, cooking characteristics, nutritional values, taste, and color | Plus |
| 36. Oupkaew P. et al. 2011 [36] | LR | Landrace | Rice | Thailand | Survey  (farmers’ interviews and rapid appraisals of seed selection of farmers) | Biological pest & disease control | Unclear |
| Crop yield | Plus |
| 37. Anastasi U. et al. 2017 [37] | LR | Improved variety | Sesame | Italy | Experiment | Crop yield | Unclear |
| Cultivation effort and crop storability | Plus |
| 38. Fang Y. et al. 2017 [38] | LR | Modern cultivar | Winter wheat | China | Experiment | Crop nutrient use efficiency | Minus |
| 39. Fenzi M. et al. 2017 [39] | LR | Improved variety, F1-Hybrid | Maize | Mexico | Experiment | Resilience to environmental changes | Plus |
| 40. Sánchez-Martín J. et al. 2017 [40] | LR | Commercial variety | Oat | Mediterranean region (Spain and Egypt) | Experiment | Biological pest & disease control | Plus |
| Crop nutrient use efficiency | Unclear |
| 41. Kante M. et al. 2017 [41] | LR | F1-Hybrid | Sorghum | Africa | Experiment | Resilience to environmental changes | Minus |

**References**

1. Biasi, R.; Brunori, E. The on-farm conservation of grapevine (Vitis vinifera L.) landraces assures the habitat diversity in the viticultural agro-ecosystem. *VITIS* **2015**, *54*, 265–269.
2. Li, J.; van Bueren, E. T. L.; Jiggins, J.; Leeuwis, C. Farmers’ adoption of maize (Zea mays L.) hybrids and the persistence of landraces in Southwest China: implications for policy and breeding. *Genet. Resour. Crop Evol.* **2012**, *59*, 1147–1160, doi:10.1007/s10722-011-9750-1.
3. Tamiru, A.; Bruce, T. J. A.; Woodcock, C. M.; Caulfield, J. C.; Midega, C. A. O.; Ogol, C. K. P. O.; Mayon, P.; Birkett, M. A.; Pickett, J. A.; Khan, Z. R. Maize landraces recruit egg and larval parasitoids in response to egg deposition by a herbivore. *Ecol. Lett.* **2011**, *14*, 1075–1083, doi:10.1111/j.1461-0248.2011.01674.x.
4. Munoz-Perea, C. G.; Allen, R. G.; Westermann, D. T.; Wright, J. L.; Singh, S. P. Water use efficiency among dry bean landraces and cultivars in drought-stressed and non-stressed environments. *EUPHYTICA* **2007**, *155*, 393–402, doi:10.1007/s10681-006-9340-z.
5. Sangabriel-Conde, W.; Negrete-Yankelevich, S.; Eduardo Maldonado-Mendoza, I.; Trejo-Aguilar, D. Native maize landraces from Los Tuxtlas, Mexico show varying mycorrhizal dependency for P uptake. *Biol. Fertil. SOILS* **2014**, *50*, 405–414, doi:10.1007/s00374-013-0847-x.
6. Fang, Y.; Liu, L.; Xu, B.-C.; Li, F.-M. The relationship between competitive ability and yield stability in an old and a modern winter wheat cultivar. *Plant Soil* **2011**, *347*, 7–23, doi:10.1007/s11104-011-0780-4.
7. Noguera, D.; Laossi, K.-R.; Lavelle, P.; de Carvalho, M. H. C.; Asakawa, N.; Botero, C.; Barot, S. Amplifying the benefits of agroecology by using the right cultivars. *Ecol. Appl.* **2011**, *21*, 2349–2356.
8. Lafitte, H. R.; Edmeades, G. O.; Taba, S. Adaptive strategies identified among tropical maize landraces for nitrogen-limited environments. *F. Crop. Res.* **1997**, *49*, 187–204, doi:10.1016/S0378-4290(96)01007-6.
9. Ghosh, R.; Pande, S.; Telangre, R.; Kathal, D.; Singh, S.; Usmani, G.; Patel, A.; Rao, S. K.; Mishra, S.; Pachuri, A.; Verma, S.; Sharma, R. N.; Gaur, P. M.; Sharma, M. Participatory varietal selection of chickpea in rainfed rice fallow lands of Chhattisgarh and Madhya Pradesh in India for sustainable crop production. *Int. J. PLANT Prod.* **2014**, *8*, 243–254.
10. Fang, Y.; Xu, B.; Liu, L.; Gu, Y.; Liu, Q.; Turner, N. C.; Li, F. M. Does a mixture of old and modern winter wheat cultivars increase yield and water use efficiency in water-limited environments? *F. Crop. Res.* **2014**, *156*, 12–21, doi:10.1016/j.fcr.2013.10.013.
11. Annicchiarico, P.; Pecetti, L.; Torricelli, R. Impact of landrace germplasm, non-conventional habit and regional cultivar selection on forage and seed yield of organically grown lucerne in Italy. *J. Agric. Sci.* **2012**, *150*, 345–355, doi:10.1017/S0021859611000700.
12. Vaezi, B.; Bavei, V.; Shiran, B. Screening of barley genotypes for drought tolerance by agro-physiological traits in field condition. *AFRICAN J. Agric. Res.* **2010**, *5*, 881–892, doi:10.5897/AJAR09.294.
13. Brocke, K. Vom; Trouche, G.; Weltzien, E.; Kondombo-Barro, C. P.; Sidibe, A.; Zougmore, R.; Goze, E. HELPING FARMERS ADAPT TO CLIMATE AND CROPPING SYSTEM CHANGE THROUGH INCREASED ACCESS TO SORGHUM GENETIC RESOURCES ADAPTED TO PREVALENT SORGHUM CROPPING SYSTEMS IN BURKINA FASO. *Exp. Agric.* **2014**, *50*, 284–305, doi:10.1017/S0014479713000616.
14. Mwololo, J. K.; Mugo, S. N.; Tefera, T.; Okori, P.; Munyiri, S. W.; Semagn, K.; Otim, M.; Beyene, Y. Resistance of tropical maize genotypes to the larger grain borer. *J. Pest Sci. (2004).* **2012**, *85*, 267–275, doi:10.1007/s10340-012-0427-0.
15. Knezevic-Jaric, J.; Prodanovic, S.; Iwarsson, M. Decline of the Maize Landrace Cultivation in Eastern Serbia. *Rom. Agric. Res.* **2014**, *31*, 11–16.
16. Calvet-Mir, L.; Calvet-Mir, M.; Vaque-Nunez, L.; Reyes-Garcia, V. Landraces in situ Conservation: A Case Study in High-Mountain Home Gardens in Vall Fosca, Catalan Pyrenees, Iberian Peninsula. *Econ. Bot.* **2011**, *65*, 146–157, doi:10.1007/s12231-011-9156-1.
17. Yadav, O. P. Drought response of pearl millet landrace-based populations and their crosses with elite composites. *F. Crop. Res.* **2010**, *118*, 51–56, doi:10.1016/j.fcr.2010.04.005.
18. Annicchiarico, P.; Pecetti, L.; Romani, M. Seed yielding ability of landraces of lucerne in Italy. *GRASS FORAGE Sci.* **2007**, *62*, 507–510, doi:10.1111/j.1365-2494.2007.00603.x.
19. D’Antuono, L. F.; Rossini, F. Yield potential and ecophysiological traits of the Altamurano linseed (Linum usitatissimum L.), a landrace of southern Italy. *Genet. Resour. Crop Evol.* **2006**, *53*, 65–75, doi:10.1007/s10722-004-0582-0.
20. vom Brocke, K.; Weltzien, E.; Christinck, A.; Presterl, T.; Geiger, H. H. Effects of farmers’ seed management on performance and adaptation of pearl millet in Rajasthan, India. *EUPHYTICA* **2003**, *130*, 267–280, doi:10.1023/A:1022830925717.
21. Boutraa, T.; Sanders, F. E. Influence of water stress on grain yield and vegetative growth of two cultivars of bean (Phaseolus vulgaris L.). *J. Agron. Crop Sci.* **2001**, *187*, 251–257, doi:10.1046/j.1439-037X.2001.00525.x.
22. Moreno, L. L.; Tuxill, J.; Moo, E. Y.; Reyes, L. A.; Alejo, J. C.; Jarvis, D. I. Traditional maize storage methods of mayan farmers in Yucatan, Mexico: Implications for seed selection and crop diversity. *Biodivers. Conserv.* **2006**, *15*, 1771–1795, doi:10.1007/s10531-004-6679-0.
23. Mazvimbakupa, F.; Modi, A. T.; Mabhaudhi, T. Seed quality and water use characteristics of maize landraces compared with selected commercial hybrids. *Chil. J. Agric. Res.* **2015**, *75*, 13–20, doi:10.4067/S0718-58392015000100002.
24. Kolech, S. A.; Halseth, D.; Perry, K.; De Jong, W.; Tiruneh, F. M.; Wolfe, D. Identification of Farmer Priorities in Potato Production Through Participatory Variety Selection. *Am. J. POTATO Res.* **2015**, *92*, 648–661, doi:10.1007/s12230-015-9478-0.
25. Leiser, W. L.; Rattunde, H. F. W.; Piepho, H.-P.; Weltzien, E.; Diallo, A.; Toure, A.; Haussmann, B. I. G. Phosphorous Efficiency and Tolerance Traits for Selection of Sorghum for Performance in Phosphorous-Limited Environments. *Crop Sci.* **2015**, *55*, 1152–1162, doi:10.2135/cropsci2014.05.0392.
26. Patil, J. V; Reddy, P. S.; Prabhakar; Umakanth, A. V; Gomashe, S.; Ganapathy, K. N. History of post-rainy season sorghum research in India and strategies for breaking the yield plateau. *INDIAN J. Genet. PLANT Breed.* **2014**, *74*, 271–285, doi:10.5958/0975-6906.2014.00845.1.
27. Yong’an, L.; Quanwen, D.; Zhiguo, C.; Deyong, Z. Effect of drought on water use efficiency, agronomic traits and yield of spring wheat landraces and modern varieties in Northwest China. *AFRICAN J. Agric. Res.* **2010**, *5*, 1598–1608.
28. Olson, M. B.; Morris, K. S.; Mendez, V. E. Cultivation of maize landraces by small-scale shade coffee farmers in western El Salvador. *Agric. Syst.* **2012**, *111*, 63–74, doi:10.1016/j.agsy.2012.05.005.
29. Danial, D.; Parlevliet, J.; Almekinders, C.; Thiele, G. Farmers’ participation and breeding for durable disease resistance in the Andean region. *EUPHYTICA* **2007**, *153*, 385–396, doi:10.1007/s10681-006-9165-9.
30. Bardsley, D.; Thomas, I. Valuing local wheat landraces for agrobiodiversity conservation in Northeast Turkey. *Agric. Ecosyst. Environ.* **2005**, *106*, 407–412, doi:10.1016/j.agee.2004.08.011.
31. Annicchiarico, P. Diversity, genetic structure, distinctness and agronomic value of Italian lucerne (Medicago sativaL.) landraces. *EUPHYTICA* **2006**, *148*, 269–282, doi:10.1007/s10681-005-9024-0.
32. Maggs-Kolling, G. L.; Christiansen, J. L. Variability in Namibian landraces of watermelon (Citrullus lanatus). *EUPHYTICA* **2003**, *132*, 251–258, doi:10.1023/A:1025053331528.
33. Joshi, K. D.; Sthapit, B. R.; Witcombe, J. R. How narrowly adapted are the products of decentralised breeding? The spread of rice varieties from a participatory plant breeding programme in Nepal. *EUPHYTICA* **2001**, *122*, 589–597, doi:10.1023/A:1017553206891.
34. Newton, A. C.; Akar, T.; Baresel, J. P.; Bebeli, P. J.; Bettencourt, E.; Bladenopoulos, K. V; Czembor, J. H.; Fasoula, D. A.; Katsiotis, A.; Koutis, K.; Koutsika-Sotiriou, M.; Kovacs, G.; Larsson, H.; de Carvalho, M. A. A.; Rubiales, D.; Russell, J.; Dos Santos, T. M. M.; Vaz Patto, M. C. Cereal landraces for sustainable agriculture. A review. *Agron. Sustain. Dev.* **2010**, *30*, 237–269, doi:10.1051/agro/2009032.
35. Zimmerer, K. S. Conserving agrobiodiversity amid global change, migration, and nontraditional livelihood networks: the dynamic uses of cultural landscape knowledge. *Ecol. Soc.* **2014**, *19*, doi:10.5751/ES-06316-190201.
36. Oupkaew, P.; Pusadee, T.; Sirabanchongkran, A.; Rerkasem, K.; Jamjod, S.; Rerkasem, B. Complexity and adaptability of a traditional agricultural system: case study of a gall midge resistant rice landrace from northern Thailand. *Genet. Resour. Crop Evol.* **2011**, *58*, 361–372, doi:10.1007/s10722-010-9579-z.
37. Anastasi, U.; Sortino, O.; Tuttobene, R.; Gresta, F.; Giuffrè, A. M.; Santonoceto, C. Agronomic performance and grain quality of sesame (Sesamum indicum L.) landraces and improved varieties grown in a Mediterranean environment. *Genet. Resour. Crop Evol.* **2017**, *64*, 127–137, doi:10.1007/s10722-015-0338-z.
38. Fang, Y.; Du, Y.; Wang, J.; Wu, A.; Qiao, S.; Xu, B.; Zhang, S.; Siddique, K. H. M.; Chen, Y. Moderate Drought Stress Affected Root Growth and Grain Yield in Old, Modern and Newly Released Cultivars of Winter Wheat. *Front. Plant Sci.* **2017**, *8*, 1–14, doi:10.3389/fpls.2017.00672.
39. Fenzi, M.; Jarvis, D. I.; Arias Reyes, L. M.; Latournerie Moreno, L.; Tuxill, J. Longitudinal analysis of maize diversity in Yucatan, Mexico: influence of agro-ecological factors on landraces conservation and modern variety introduction. *Plant Genet. Resour.* **2017**, *15*, 51–63, doi:10.1017/S1479262115000374.
40. Sánchez-Martín, J.; Rispail, N.; Flores, F.; Emeran, A. A.; Sillero, J. C.; Rubiales, D.; Prats, E. Higher rust resistance and similar yield of oat landraces versus cultivars under high temperature and drought. *Agron. Sustain. Dev.* **2017**, *37*, doi:10.1007/s13593-016-0407-5.
41. Kante, M.; Rattunde, H. F. W.; Leiser, W. L.; Nebié, B.; Diallo, B.; Diallo, A.; Touré, A. O.; Weltzien, E.; Haussmann, B. I. G. Can tall guinea-race sorghum hybrids deliver yield advantage to smallholder farmers in west and central Africa? *Crop Sci.* **2017**, *57*, 833–842, doi:10.2135/cropsci2016.09.0765.
